## **Adult sex ratio bias in snowy plovers is driven by sex-specific early survival: implications for mating systems and population growth**

Luke J. Eberhart-Phillips<sup>a,1</sup>, Clemens Küpper<sup>b,c,2</sup>, Tom E. X. Miller<sup>d</sup>, Medardo Cruz-López<sup>e</sup>, Kathryn H. Maher<sup>f</sup>, Natalie dos Remedios<sup>g</sup>, Martin A. Stoffel<sup>a</sup>, Joseph I. Hoffman<sup>a,2</sup>, Oliver Krüger<sup>a,2</sup>, and Tamás Székely<sup>f,h,2</sup>

<sup>a</sup>Department of Animal Behaviour, Bielefeld University, Morgenbreede 45, 33615 Bielefeld, Germany

<sup>b</sup>Max Planck Institute for Ornithology, Eberhard-Gwinner-Str., 82319 Seewiesen, Germany

<sup>c</sup>Institute of Zoology, University of Graz, Universitätsplatz 2, 8010 Graz, Austria

<sup>d</sup>Department of BioSciences, Program in Ecology and Evolutionary Biology, Rice University, MS-170, Houston, TX 77005, USA

<sup>e</sup>Posgrado de Ciencias del Mar y Limnología, Unidad Académica Mazatlán, Universidad Nacional Autónoma de México, Ciudad Universitaria, 04510 México D.F., Mexico

<sup>f</sup>Milner Centre for Evolution, Department of Biology and Biochemistry, University of Bath, Claverton Down, Bath BA2 7AY, UK origin

<sup>g</sup>Department of Animal and Plant Sciences, University of Sheffield, Western Bank, Sheffield S10 2TN, UK

<sup>h</sup>State Key Laboratory of Biocontrol and College of Ecology and Evolution, Sun Yat-Sen University, Guangzhou 510275, China

<sup>2</sup>Joint senior authors

*Classification:* BIOLOGICAL SCIENCES: Population Biology

*Running title:* Origins of adult sex ratio in a polygamous bird

*Keywords:* ASR, *Charadrius nivosus*, frequency-dependence, life history, LTRE, mark-recapture, mating function, sex allocation, two-sex model, Lefkovitch matrix

*Abstract word count:* 190

*Significance statement word count:* 120

*Main text word count:* 4810

*Number of references:* 77

*Number of figures and tables:* 7

<sup>1</sup>*Corresponding author contact information:*

Luke J. Eberhart-Phillips, PhD candidate,  
Department of Animal Behaviour, Bielefeld University,  
Morgenbreede 45, 33615 Bielefeld, Germany  
Email: [luke.eberhart@uni-bielefeld.de](mailto:luke.eberhart@uni-bielefeld.de)  
Phone: +49 521 106 2837  
Fax: +49 521 106 2998  
ORCID iD: 0000-0001-7311-6088

*Statement of authorship:*

LEP, OK, JH, CK, and TS conceived the study. CK, TS, and MCL planned and collected the field data. KHM and NdR conducted the sex-typing. LEP, CK, and MS performed the survival analysis. LEP, TM, and OK implemented the matrix modeling. LEP, JH, and TS wrote the manuscript. LEP and MS wrote the RMarkdown code. All authors contributed substantially to revisions of the paper.

*Data accessibility statement:*

We provide all computer code and documentation as a PDF file written in Rmarkdown together with all raw datasets needed to reproduce our modeling and analyses. These can be downloaded from the GitHub repository found here: [https://github.com/leberhartphillips/Ceuta ASR matrix modeling](https://github.com/leberhartphillips/Ceuta_ASR_matrix_modeling)

1 **ABSTRACT**

2 Adult sex ratio (ASR) is a central concept in population biology and a key factor in sexual  
3 selection, yet why do most demographic models ignore sex-biases? Vital rates often vary  
4 between the sexes and across life history, but their relative contributions to ASR variation  
5 remain poorly understood—an essential step to evaluate sex ratio theories in the wild and  
6 inform conservation. Here we combine structured two-sex population models with  
7 individual-based mark-recapture data from an intensively monitored polygamous population  
8 of snowy plovers. We show that a strongly male-biased ASR is primarily driven by sex-  
9 specific survival of juveniles, rather than adults or dependent offspring. This provides  
10 empirical support for theories of unbiased sex allocation when sex-differences in survival  
11 arise after the period of parental investment. Importantly, a conventional model ignoring sex-  
12 biases significantly overestimated population viability. We suggest that sex-specific  
13 population models are essential to understand the population dynamics of sexual organisms:  
14 reproduction and population growth is most sensitive to perturbations in survival of the  
15 limiting sex. Overall, our study suggests that sex-biased early survival may contribute  
16 towards mating system evolution and population persistence, with implications for both  
17 sexual selection theory and biodiversity conservation.

18 **SIGNIFICANCE STATEMENT**

19 Sex biases are widespread in nature and represent a fundamental component of sexual  
20 selection and population biology—but at which point in life history do these biases emerge?  
21 Here we report a detailed individual-based demographic analysis of an intensively studied  
22 wild bird population to evaluate the origins of sex biases and their consequences on mating  
23 strategies and population dynamics. We document a strongly male-biased adult sex ratio,  
24 which is consistent with behavioral observations of female-biased polygamy. Notably, sex-  
25 biased juvenile, rather than adult survival, contributed most to the adult sex ratio. Sex-biases  
26 also strongly influenced population viability, which was significantly overestimated when sex  
27 ratio and mating system were ignored. Our study therefore has implications for both sexual  
28 selection theory and biodiversity conservation.

4 | Eberhart-Phillips et al. *Origins of adult sex ratio in a polygamous bird*

29 Sex ratio variation in wild populations has important consequences for population dynamics  
30 and hence biodiversity conservation (1). As reproduction in sexual organisms involves both  
31 males and females, a shortage of either sex could compromise population viability (2). A  
32 reduction in the number of breeding females directly reduces birth rates and hence population  
33 productivity (3), whereas an overabundance of males may increase violence and aggression  
34 such that both male and female survival is reduced (4). Although a small number of males  
35 can potentially fertilize many mates, females in male-biased populations may need to  
36 compete for breeding opportunities with high quality males which can induce additional  
37 mortality (5). If males are in short supply, fathers also tend to reduce their parental  
38 investment which could negatively impact offspring survival (6, 7). Additionally, a biased  
39 sex ratio in either direction will decrease effective population size, which has adverse  
40 consequences for genetic diversity (8). Therefore, depending on mating system, populations  
41 with biased sex ratios may be more vulnerable to extinction than unbiased populations (9).

42 Recent studies also suggest that the adult sex ratio (ASR, the proportion of the adult  
43 population that is male) impacts breeding strategies as the limiting sex has the advantage in  
44 mating and parental decisions (10-12). For example, male-biased avian populations tend to  
45 have polyandrous mating systems and male-biased parental provisioning (13). Although the  
46 theory linking ASR to breeding system is relatively new, there are already supporting studies:  
47 parental cooperation is associated with an unbiased ASR in birds (14) whereas ASR is a  
48 strong predictor of sex-specific sexual activity and divorce rates in humans (15, 16).

49 Despite the importance of ASR in population biology, biodiversity conservation and  
50 breeding system evolution, the origin(s) of ASR biases remain unclear. Biases in the ASR  
51 can emerge via a number of mutually non-exclusive demographic pathways (11, 17, 18). For  
52 instance, sex-biases may occur at conception or at birth (19), or the survival of male and  
53 female juveniles may differ to the extent that fewer of one sex reaches adulthood (20).

5 | Eberhart-Phillips et al. *Origins of adult sex ratio in a polygamous bird*

54 Furthermore, sex-differences in adult survival or maturation rates could create a shortage of  
55 the sex that has higher mortality (4) or slower maturation (18), and if emigration is not  
56 compensated by immigration, sex-differences in dispersal behavior could create local biases  
57 in ASR (21).

58 A number of studies of wild vertebrate populations have evaluated the independent  
59 contributions of the above pathways to ASR bias (22-24). However, to fully understand ASR  
60 bias requires these components to be modeled simultaneously to quantify their relative  
61 contributions. In practice, large empirical datasets from natural populations incorporating  
62 stage- and sex-specific vital rates are uncommon (25-27). Furthermore, males and females  
63 often have different behaviors or ecological niches (28), which can make one or the other  
64 easier to detect (9, 11). Fortunately, these sources of sampling bias can be accounted for  
65 using mark-recapture methods (29).

66 Here, we investigate the demographic origins of ASR bias in a polygamous bird using  
67 seven years of individual-based sex- and stage-specific life history data. Polygamous species  
68 have a special significance in sex ratio studies as they are predicted to be at higher risk of  
69 extinction (1, 30). We studied a small ground-nesting shorebird, the snowy plover  
70 (*Charadrius nivosus*, ref. 31), which is endangered in parts of its Nearctic range and has a  
71 sequentially polygamous mating system (32, 33). Using a two-sex matrix model, we show  
72 that the ASR of this species is substantially more male biased than previously reported (34).  
73 Sex-differences in chick and juvenile survival contribute most to ASR bias, suggesting that  
74 ASR variation is particularly susceptible to factors that influence early life history stages.  
75 Furthermore, we show that population growth is most sensitive to adult female survival under  
76 a male-biased ASR, signifying that sex-specific early survival can affect population viability  
77 via ASR variation. Importantly, our study suggests that sex-biased survival in early life has  
78 ramifications for mating system variation and knock-on effects for population growth.

79

## 80 **RESULTS**

81 We conducted this study at Bahía de Ceuta, a subtropical lagoon on the coastal plain in north-  
82 western Mexico (23°54'N, 106°57'W). Between 2006 and 2012, we uniquely marked and  
83 monitored 1259 individuals (436 females and 390 males initially marked as chicks and 221  
84 females and 212 males initially marked as adults). Although our marking methods were  
85 limited to breeding adults and chicks, we detected no sex difference in the proportion of this  
86 marked population that was non-breeding (paired t-test:  $t = 0.429$ ,  $df = 4$ ,  $P = 0.69$ , Fig. S1).  
87 Therefore, this marked subset of the population represents a broadly representative sample  
88 from which to draw inferences about the dynamics of the population at large and to elucidate  
89 the contributions of sex- and stage-specific survival towards ASR bias.

90

### 91 *Mating system*

92 To understand the ASR in the context of mating system, we quantified sex-specific mating  
93 strategies of snowy plovers at our study site. Although both sexes can be polygamous, female  
94 snowy plovers typically desert broods to seek serial mates, leaving males to provide parental  
95 care alone (33). Thus, we expected that females would acquire on average a greater number  
96 of mates per year than males. Based on behavioral observations of 456 families with known  
97 identities of both parents, this is precisely what we found (Fig. 1; Mann-Whitney-Wilcoxon  
98 test:  $W = 3264$ ,  $P \leq 0.001$ ). As such, the mating system index in the mating function (Eq. 4 in  
99 *Methods*) was polyandrous ( $h = 0.82$ ).

100

### 101 *Sex-biased survival and ASR bias*

102 We estimated stage- and sex-specific survival rates using mark-recapture analysis to control  
103 for imperfect detection in the field. Mark-recapture modeling revealed sex differences in

7 | Eberhart-Phillips et al. *Origins of adult sex ratio in a polygamous bird*

104 encounter probability for juveniles and adults that would confound simple estimates of  
105 survival and ASR based solely on return rates or uncorrected counts of males and females  
106 (Table 1). Apparent survival was strongly male biased across all life-history stages, with male  
107 survival being 11.5% higher than female survival at the chick stage, 51% higher for juveniles,  
108 and 0.5% higher at the adult stage (Fig. 2a). Hatching sex ratio was slightly female biased but  
109 did not significantly deviate from parity (average  $\rho = 0.486$  [95% CI = 0.435–0.536],  $P =$   
110 0.588,  $N = 340$  hatchlings from 116 full broods). Overall, our model indicated a strongly  
111 male-biased ASR (mean = 0.632 [95% CI = 0.460–0.785]; Fig. 2b).

112

113 *Contributions to male-biased ASR*

114 To elucidate the stage-specific contributions of sex differences in survival to ASR bias, we  
115 conducted a life table response experiment (LTRE), which revealed that all vital rates  
116 contributed in the same direction (i.e. male-biased) but differed in magnitude. A sex  
117 difference in juvenile survival made the largest overall contribution to ASR bias (Fig. 2c).  
118 Specifically, the contribution of sex-biased juvenile survival towards ASR was 3.3 times  
119 higher than sex-biased chick survival and 17.6 times higher than sex-biased adult survival.  
120 Hatching sex ratio and mating system made negligible contributions (Fig. 2c).

121

122 *Consequences of ASR bias and polygamy on population viability*

123 Biased ASR and polygamy create conditions whereby reduced survival of the limiting sex  
124 can compromise population viability, which has important implications for conservation. Our  
125 perturbation analysis showed that population growth was most sensitive to adult survival  
126 under all hypothetical scenarios of ASR and mating system (Fig. 3). Adult female survival  
127 elasticities were highest under scenarios of male-biased ASR. As expected, there was no sex-

128 specific sensitivity of vital rates under an unbiased ASR and monogamous mating system.

129 However, elasticity was highest for adult males under an unbiased ASR and polyandry.

130 To elucidate the conservation consequences of disregarding sex-biases, we compared

131 the predictive accuracy of a detailed two-sex model incorporating polygamy to a

132 conventional one-sex model. Over the seven-year study period, average population growth

133 was below replacement ( $\bar{\lambda}_{\text{obs.}} = 0.859 \pm 0.28 \text{ SD}$ , Fig. 4). This observed rate of decline was

134 captured by the uncertainty distribution of the two-sex model ( $\bar{\lambda}_{\text{two-sex}} = 0.849$  [95% CI:

135 0.802–0.897], Fig. 4). In contrast, the one-sex version of the model exhibited greater

136 uncertainty and significantly overestimated population growth ( $\bar{\lambda}_{\text{one-sex}} = 0.947$  [95% CI:

137 0.883–1.01], Fig. 4).

138

## 139 **DISCUSSION**

140 We present a comprehensive demographic model based on detailed individual-based life-

141 history data from an intensively monitored bird population. By incorporating sex-specific

142 feedbacks between survival and frequency-dependent reproduction, our model predicted a

143 strongly male-biased ASR. This was complemented by our behavioral observations of a

144 polyandrous mating system. Therefore, our findings build upon recent empirical and

145 theoretical studies linking ASR to the evolutionary origins and consequences of mating

146 system variation (10-12), and also provide novel insights into the sex- and stage-specific

147 demographic components that contribute to ASR bias. Males had consistently higher

148 apparent survival than females across all life stages, but a sex difference in the apparent

149 survival of juveniles had the largest impact on ASR bias. Furthermore, population growth

150 was most sensitive to perturbations in adult female survival under the male-biased ASR.

151 Taken together, our results uncover the demographic pathways linking individual-level

152 variation in survival and sex roles to population-level dynamics.



153           Obtaining reliable survival estimates from natural populations is challenging due to  
154 sex differences in behavior and life history. Our study addressed this uncertainty through  
155 mark-recapture models and bootstrapping. A central assumption of our model is that our  
156 marked subset of the population is representative of the entire population. This is appropriate  
157 given that we marked the vast majority of chicks and breeding adults in the population.  
158 Furthermore, we did not find a sex difference in the proportion of breeders versus non-  
159 breeders (Fig. S1) indicating that our ASR estimate is not confounded by an excess number  
160 of unmarked non-breeding females.

161           Females had higher rates of polygamy than males, which is in line with most  
162 published records from other snowy plover populations (32, 35). This female-biased mating  
163 system complemented a strongly male-biased ASR. ASR in this species has previously been  
164 reported to be less extreme (34) than found here although the previous study was unable to  
165 incorporate sex-specific chick and juvenile survival, which made the greatest contributions to  
166 the ASR bias in this population (this study) and others (36). ASR bias is a widespread  
167 phenomenon in wild vertebrate populations, with mammals typically being female biased  
168 (mean ASR =  $0.37 \pm 0.15$  SD) and birds typically being male biased (mean ASR =  $0.55 \pm$   
169  $0.09$  SD; Table S1; (37). Our ASR estimate for snowy plovers therefore lies within the  
170 natural variation observed in other avian taxa (9).

171

#### 172 *Importance of early sex-specific demographic processes*

173 Several hypotheses can be put forward to explain the observed pattern of male-biased early  
174 survival. Focusing first on the chicks, male hatchlings are significantly larger than their  
175 sisters in this population (38), potentially providing males with an advantage during early  
176 development. Another mutually non-exclusive possibility is that male chicks could achieve  
177 faster growth rates, as has been observed in Kentish plovers *Charadrius alexandrinus* (38),

178 for example, either by virtue of sex-specific parental care (39) or as a consequence of sex-  
179 specific immunocompetence (40). Alternatively, predation could act sex-specifically,  
180 although male and female chicks do not differ appreciably in appearance and behavior, and  
181 we did not detect a sex difference in encounter rates (Fig. S2). Lastly, the sexes might differ  
182 in premature investment in sexual traits (41) although this seems unlikely as sexual  
183 ornamentation is moderate and body size differences are small (ref. 31; about 4%).

184         The sex bias during the juvenile stage made the largest contribution to the ASR bias.  
185 This corroborates the results of earlier avian studies showing that sex-specific first-year  
186 survival may lead to an ASR bias (25, 36). Our study goes further than previous works by  
187 decomposing the contributions from the first-year stage into chick and juvenile contributions.  
188 Juvenile survival contributed most towards ASR bias, probably because these naïve  
189 individuals face multiple challenges during the transition from parental independence to  
190 sexual maturity, potentially including predation, harsh winter climates and food shortages, all  
191 of which could disproportionately affect either sex. For example, in sexually size dimorphic  
192 species including red deer *Cervus elaphus* and great bustards *Otis tarda*, male young are less  
193 able to cope with severe winter weather (42) and food shortage (43), probably owing to the  
194 metabolic demands of large body size. In snowy plovers, such a mechanism is unlikely given  
195 the moderate size differences between males and females (31).

196         Another possibility is that sex-biased dispersal behavior could contribute towards sex-  
197 differences in apparent juvenile survival, as natal dispersal is typically female biased in birds  
198 (44), with snowy plovers being no exception (45, 46). However, dispersal and survival are  
199 not necessarily independent phenomena, as dispersal often entails survival costs such as  
200 increased predation risk and unfamiliarity of novel environments (47). Moreover, chicks are  
201 unable to disperse beyond the breeding site, so their survival estimate approximated true  
202 survival and thus implies a role of intrinsic sex differences in early survival. In addition, over

203 the seven years of this study, few adults were resighted in adjacent populations and these  
204 individuals are unbiased with respect to sex. Finally, an independent study of snowy plovers  
205 in Monterey Bay, California found that survival was male biased even after accounting for  
206 sex-specific dispersal (34).

207

#### 208 *Negligible effect of sex allocation*

209 The hatching sex ratio, based on 340 hatchlings, was unbiased and served as a proxy for the  
210 primary sex ratio. Despite popular interest in sex-allocation theory (48, 49) relatively few  
211 studies have convincingly demonstrated offspring sex ratio biases in wild populations (50).  
212 Düsing (51), Fisher (52), and others (53-55) reasoned that if sex biases in survival emerged  
213 after the period of parental investment, sex allocation should not deviate from parity. This is  
214 precisely what we found, with ASR being strongly influenced by the sex-biased survival of  
215 independent juveniles, rather than deviations in the hatching sex ratio (Fig. 2). Furthermore,  
216 although the sex-biased survival of dependent chicks provided a noteworthy contribution to  
217 ASR bias (Fig. 2), fathers provide uniparental care of chicks in this species, and therefore the  
218 period of maternal investment typically ends at hatching. Given this parental care system, our  
219 result further confirms theoretical expectations of an unbiased hatching sex ratio.

220

#### 221 *Evolutionary feedbacks between ASR and mating system*

222 Mating systems are influenced by the availability of mates (11). A biased ASR creates  
223 conditions whereby one sex is in limited supply, thus forcing the other sex to compete for  
224 access to mates (7, 10). In shorebirds, ASR is a strong predictor of mating and parental  
225 strategies (13), with the limiting sex tending to have greater mating opportunities and reduced  
226 parental investment. These sex differences in the costs and benefits of parental care may  
227 facilitate polygamy (6).

228           However, the relationship between sex ratio and mating system represents a causality  
229 dilemma because of the positive feedback that polygamous mating systems impose on ASR  
230 bias and *vice versa* (56). On the one hand, polygamy entails sex-specific costs due to sexual  
231 selection which could drive the ASR bias, while on the other hand ASR bias creates uneven  
232 mating opportunities and thus facilitates polygamy. We show that sex biases originate prior  
233 to maturity (Fig. 5i), and are therefore likely influenced by natural selection. For example,  
234 genotype-sex interactions could impact chick survival during development (57) rather than  
235 during adulthood where sexual selection is expected to have a strong impact on survival.  
236 Consequently, ASR bias appears to drive the mating system rather than *vice versa* (Fig. 5ii).  
237 We cannot discount the possibility that sexual selection contributes towards sex biases in  
238 early survival, for instance via differential early investment in secondary sexual traits (41),  
239 but this seems unlikely as sexual dimorphism in plovers is negligible and, if anything, males  
240 are more ornamented than females (31, 58).

241

#### 242 *Consequences of mating system and ASR on population growth*

243 In vertebrates, adult survival is often the most important parameter influencing population  
244 growth because adults have the greatest reproductive potential (59). This was the case in our  
245 population, but the effect of adult survival was sex-specific due to ASR bias and polygamy.  
246 Under a male-biased ASR, adult female survival had the highest elasticity to population  
247 growth, meaning that a small perturbation to adult female survival has a larger effect on  
248 population growth than an equivalent perturbation in all other parameters. Attempting to  
249 dissect the effects of ASR and mating system, we found that sex-specific elasticities of adults  
250 were greatest under scenarios of male-biased ASR compared to scenarios of polyandry (Fig.  
251 5iii). Conversely, in scenarios of unbiased ASR, both sexes had the same elasticities for all  
252 parameters under monogamy, but under polyandry, adult male survival had the highest

253 elasticity. These contrasts highlight the reproductive constraints imposed on populations with  
254 a biased ASR. When ASR is male-biased, polyandrous mating strategies optimize individual  
255 fecundity, and thus maximize population growth (1). However, reproduction is dependent on  
256 the availability of gametes, and thus a population with female-biased ASR and a polygynous  
257 mating system may not be limited in the same way because a single male can produce many  
258 more gametes than a single female and hence father more offspring. Therefore, similar  
259 studies of polygynous populations are needed to critically test the predictions of mating  
260 system, ASR, and population growth.

261

#### 262 *Implications of two-sex vs one-sex modeling for biodiversity conservation*

263 Modeling population trajectories is an important tool for conservation and management (60).  
264 Sex biases could potentially play an important role in population dynamics, particularly for  
265 polygamous species, yet sex-structured models remain uncommon. Here, we compare a  
266 conventional one-sex model to a two-sex model incorporating frequency-dependent  
267 reproduction and sex-specific survival. We show that our two-sex model provides a better fit  
268 to the observed data than a one-sex model. Moreover, while both models indicate negative  
269 population trajectories, the one-sex model substantially underestimates the rate of population  
270 decline and exhibits greater uncertainty. This has important conservation implications,  
271 especially for sex-biased populations of threatened or endangered species, where failing to  
272 incorporate sex-specific vital rates could lead to erroneous conclusions and overestimated  
273 population viability.

274

#### 275 *Conclusions*

276 With the rise of conservation-based monitoring of individually marked populations (61), a  
277 wealth of demographic data present new scientific horizons for ecologists and evolutionary

278 biologists interested in sex-specific modeling. By combining extensive individual-based sex-  
279 and stage-specific vital rates and structured population models, we show that a male-biased  
280 ASR in a natural population is driven by male-biased survival of early life history stages (Fig.  
281 5i). Our results indicate that ASR likely drives mating system (Fig. 5ii) although further  
282 experimental and/or comparative studies are needed to establish the causal link. Both ASR  
283 and mating system facilitate sex-specific sensitivities to population growth (Fig. 5iii), with  
284 ASR having the strongest effect. Male-biased survival in snowy plovers is consistent with  
285 recent comparative studies (62, 56) suggesting that many bird species may exhibit male-  
286 biased ASR (9, 37). Thus, our study makes an important contribution to understanding a  
287 widespread phenomenon in natural populations and highlights that ASR variation likely acts  
288 as an important catalyst of mating system dynamics and population viability.

289

## 290 **METHODS**

### 291 *Field and laboratory methods*

292 Over the seven-year study period, we collected mark-recapture and individual reproductive  
293 success data during daily surveys of the study site over the entire three-month breeding  
294 season that typically spanned from mid-April to mid-July. Plover chicks and adults were  
295 captured using funnel traps on broods or nests (63). We assigned adults a unique color  
296 combination of three darvic rings and an alpha-numeric metal ring, allowing the use of both  
297 captures and non-invasive resightings to estimate survival. Regular brood resightings  
298 combined with regular recaptures aided analyses of daily survival for chicks. Given our  
299 intensive nest search and capture efforts we are confident that we ringed the vast majority of  
300 chicks (>95%) and breeding adults (>85%) in the local population. Nests and broods were  
301 frequently monitored every two to seven days to assess daily survival and identify tending  
302 parents. During captures, approximately 25–50  $\mu$ L of blood was sampled from the meta-tarsal

303 vein of chicks and the brachial vein of adults for molecular sexing with the Z-002B marker  
304 (64) and verification with the Calex-31 marker located on the W chromosome (65). Details of  
305 our PCR conditions are found elsewhere (38).

306

#### 307 *Quantifying mating system*

308 We evaluated mating system of the population using a dataset that only included individuals  
309 for which we (i) were confident of the identity of their mates, and (ii) had observed them in at  
310 least two reproductive attempts that were either within the same season or in different  
311 seasons. Sex differences in the per capita number of annual mates were evaluated using a  
312 non-parametric Mann-Whitney-Wilcoxon test.

313

#### 314 *Estimation of sex- and stage-specific survival*

315 Our structured population model considered sex-specific survival across three key stage  
316 classes in avian life history: chicks, juveniles, and adults (Fig. 6). The chick stage was  
317 defined as the 25-day period between hatching and fledging during which offspring are  
318 dependent upon parental care (66). The juvenile stage was defined as the one-year transition  
319 period spanning from fledging to recruitment into the adult population. The adult stage  
320 represented a stasis stage in which individuals were annually retained in the population.

321 We used mark-recapture models to account for sex, stage, and temporal variation in  
322 encounter ( $p$ ) and apparent survival ( $\phi$ ) probabilities as they allow for imperfect detection of  
323 marked individuals during surveys and the inclusion of individuals with unknown fates (29).  
324 We use the term “apparent survival” as true mortality cannot be disentangled from permanent  
325 emigration in this framework (29). Furthermore, only a few nearby populations are regularly  
326 monitored and we have limited evidence that marked individuals disperse. See *SI Methods*  
327 for further details of our survival analysis.

328

329 *Matrix model structure*

330 We built a two-sex pre-breeding Lefkovich matrix model for the population that  
 331 incorporated all three stages of plover life history into two annual transitions denoting first-  
 332 years and adults (Fig. 6). Transitions of projection matrices are required to have equal  
 333 temporal durations (67), and thus the chick stage (25 days) was combined with the juvenile  
 334 stage (~11 months) as lower-level matrix elements to describe the transition of premature  
 335 individuals into adulthood (Fig. 6). The projection of the matrix for one annual time step ( $t$ ) is  
 336 given by:

$$337 \quad \mathbf{n}_t = \mathbf{M}\mathbf{n}_{t-1} \quad (1)$$

338 where  $\mathbf{n}$  is a  $4 \times 1$  vector of the population distributed across the two life stages and two  
 339 sexes:

$$340 \quad \mathbf{n} = \begin{bmatrix} \text{♀ 1st year} \\ \text{♀ Adult} \\ \text{♂ 1st year} \\ \text{♂ Adult} \end{bmatrix} \quad (2)$$

341 and  $\mathbf{M}$  is expressed as a  $4 \times 4$  matrix:

$$342 \quad \mathbf{M} = \begin{bmatrix} 0 & R_{\text{♀}}(1 - \rho) & 0 & R_{\text{♂}}(1 - \rho) \\ \phi_{\text{♀C}} \phi_{\text{♀J}} & \phi_{\text{♀A}} & 0 & 0 \\ 0 & R_{\text{♀}}\rho & 0 & R_{\text{♂}}\rho \\ 0 & 0 & \phi_{\text{♂C}} \phi_{\text{♂J}} & \phi_{\text{♂A}} \end{bmatrix} \quad (3)$$

343 where transition probabilities ( $\phi$ ) between life stages are the survival of chicks ( $C$ ), juveniles  
 344 ( $J$ ), and adults ( $A$ ) for females ( $\text{♀}$ ) and males ( $\text{♂}$ ). The hatching sex ratio ( $\rho$ ) describes the  
 345 probability of hatchlings being either male (i.e.  $\rho$ ) or female (i.e.  $1 - \rho$ ). Per-capita  
 346 reproduction of females ( $R_{\text{♀}}$ ) and males ( $R_{\text{♂}}$ ) is expressed through sex-specific mating  
 347 functions used to link the sexes and produce progeny for the following time step of the model



348 given the relative frequencies of each sex (67). Here, we use the harmonic mean mating  
349 function which accounts for sex-specific frequency dependence (68):

$$350 \quad R_{\text{♀}} = \frac{kn_{\text{♂}}}{n_{\text{♂}} + n_{\text{♀}}h^{-1}} \quad R_{\text{♂}} = \frac{kn_{\text{♀}}}{n_{\text{♂}} + n_{\text{♀}}h^{-1}} \quad (4)$$

351 where  $k$  is the modal clutch size (3 in the case of snowy plovers),  $h$  is an index of the mating  
352 system ( $h > 1$  signifies polygyny,  $h = 1$  monogamy, and  $h < 1$  polyandry), and  $n_{\text{♀}}$  and  $n_{\text{♂}}$  are  
353 the densities of females and males, respectively, in each time step of the model. In  
354 accordance with the predominantly polyandrous mating system,  $h$  was defined as the inverse  
355 of the average annual number of mates per female:

$$356 \quad h = \frac{1}{\text{mates}/\text{♀}} \quad (5)$$

357 which we estimated from our behavioral observations of mating system (see above). To  
358 account for potential sex-biases arising prior to the chick stage (i.e. sex-allocation), we  
359 evaluated if the hatching sex ratio deviated significantly from parity (see *SI Methods* for  
360 details).

361

### 362 *Estimation of the adult sex ratio*

363 We estimated ASR from the stable stage distribution ( $\mathbf{w}$ ) of the two-sex matrix model:

$$364 \quad \text{ASR} = \frac{w_{\text{♂A}}}{w_{\text{♂A}} + w_{\text{♀A}}} \quad (6)$$

365 where  $w_{\text{♂A}}$  and  $w_{\text{♀A}}$  give the proportion of the population composed of adult males and  
366 females, respectively, at equilibrium. To evaluate uncertainty in our estimate of ASR due to  
367 sampling and process variation in our survival parameters, we implemented a bootstrapping  
368 procedure that resampled our mark-recapture data (see *SI Methods* for details).

369

### 370 *Life table response experiment of ASR contributions*

371 Perturbation analyses provide important information about the relative effect that each  
372 component of a matrix model has on the population-level response, in our case ASR. To  
373 assess how influential a sex bias in parameters associated with each of the three life stages  
374 was on ASR dynamics, we employed a life-table response experiment (LTRE). A LTRE  
375 decomposes the difference in response between two or more "treatments" by weighting the  
376 difference in parameter values by the parameter's contribution to the response (i.e. its  
377 sensitivity), and summing over all parameters (67). Here, we compared the observed scenario  
378 ( $\mathbf{M}$ ), to a hypothetical scenario ( $\mathbf{M}_0$ ) whereby all female survival rates were set equal to the  
379 male rates and the hatching sex ratio was unbiased (i.e.  $\rho = 0.5$ ). Thus, our LTRE identifies  
380 the drivers of ASR bias by decomposing the difference between the ASR predicted by our  
381 model and an unbiased ASR (25).

382 The contributions (C) of lower-level demographic parameters ( $\theta$ ) were calculated  
383 following Veran and Beissinger (25):

$$384 \quad C(\theta) = (\theta_{\sigma} - \theta_{\text{f}}) \times \frac{\partial \text{ASR}}{\partial \theta} \quad (7)$$

385 where  $\frac{\partial \text{ASR}}{\partial \theta}$  is the sensitivity of ASR to perturbations in the demographic rate  $\theta$  in matrix  $\mathbf{M}'$ ,  
386 which is a reference matrix "midway" between the two scenarios (67):

$$387 \quad \mathbf{M}' = \frac{\mathbf{M} + \mathbf{M}_0}{2} \quad (8)$$

388 The two-sex mating function makes our model non-linear in the sense that the  
389 projection matrix, and specifically the fertility elements (Eq. 4), depend on sex-specific  
390 population structure. Perturbation analyses must therefore accommodate the indirect effects  
391 of parameter perturbations on population growth via their effects on population structure. To  
392 estimate the sensitivities of the vital rate parameters to ASR we employed numerical methods  
393 that independently perturbed each parameter of the matrix, simulated the model through 1000  
394 time steps, and calculated ASR at equilibrium. This produced parameter-specific splines from

395 which  $\frac{\partial \text{ASR}}{\partial \theta}$  could be derived. Our approach appropriately accounts for the non-linear  
396 feedbacks between vital rates and population structure, though it does not isolate the  
397 contribution of this feedback (26, 69).

398

399 *Population growth consequences to ASR bias and a polygamous mating system*

400 Biased ASR and polygamous mating systems can restrict the reproductive potential of a  
401 population due to a scarcity of the limiting sex (70). Thus, population viability can be  
402 indirectly affected by ASR and mating system via the sex-specific effects that vital rates have  
403 on population growth under a biased ASR or a polygamous mating system, or both (71). To  
404 investigate the relative influence that a biased ASR or a polygamous mating system has on  
405 population growth, we conducted a sensitivity analysis of all sex-specific parameters using  
406 four scenarios of the two-sex model: (i) polyandrous and male-biased ASR (i.e. the observed  
407 scenario), (ii) polyandrous and unbiased ASR, (iii) monogamous and male-biased ASR, and  
408 (iv) monogamous and unbiased ASR. In polyandrous scenarios,  $h$  was set to the value from  
409 field observations, whereas in monogamous scenarios,  $h = 1$ . In scenarios of unbiased ASR,  
410 male survival rates were assigned to both sexes (i.e.  $\mathbf{M}_0$  above), whereas the original sex-  
411 specific structure was retained in male-biased scenarios.

412 Under each scenario, sensitivities of  $\lambda$  to perturbations in each parameter ( $\theta$ ) were  
413 estimated numerically as described above. Sensitivities were rescaled into elasticities ( $e$ ),  
414 which describe the proportional response of  $\lambda$  to a proportional perturbation of a demographic  
415 parameter (67). This way, the sensitivity of parameters become directly comparable.

416 Elasticities were calculated as:

417 
$$e(\theta) = \frac{\theta}{\lambda} \times \frac{\partial \lambda}{\partial \theta} \quad (9)$$

418 where  $\frac{\partial \lambda}{\partial \theta}$  is the sensitivity of  $\lambda$  to perturbations in parameter  $\theta$ .

419

420 *Comparison of two-sex versus one-sex models*

421 Two-sex population models are rarely used in conservation biology because of the detailed  
422 data required to correctly parameterize them (70). As such, vital rates are typically estimated  
423 for only one sex or generalized across both sexes. However, in polygamous species,  
424 reproductive success varies according to the relative frequencies of mates (71), which is  
425 dictated by ASR and sex-specific survival. Therefore, ignoring sex-specific vital rates in  
426 polygamous species could misinform conservationists and wildlife management of  
427 population viability.

428 To explore how population growth varies under a two-sex model and a conventional  
429 one-sex model, we compared deterministic population growth of the two-sex model (**M**) to  
430 that of a one-sex model in which rates were averaged over both sexes (**A**):

431 
$$\mathbf{A} = \begin{bmatrix} 0 & F \\ \phi_C \phi_J & \phi_A \end{bmatrix} \quad (10)$$

432 where  $F$  is the average annual per capita fecundity of females (expressed as hatchlings), and  
433  $\phi$  is the sex-averaged survival of chicks (C), juveniles (J), and adults (A). Deterministic  
434 growth ( $\lambda$ ) was calculated as the dominant eigenvalue of **A** and as the asymptotic value of  
435  $\sum w_{t-1} / \sum w_t$  for **M**. To acknowledge uncertainty, we utilized the bootstrapped survival  
436 analysis described above by estimating the  $\lambda$  of each iteration under the structure of **A** or **M**.  
437 We contrasted the central tendency and spread of these distributions to one another and to the  
438 arithmetic average  $\lambda$  of the actual population trend over the seven-year study period.

439 All of our modelling and statistical analyses were conducted using R version “Bug in  
440 Your Hair” (72) with significance testing evaluated at  $\alpha = 0.05$ . We provide all computer  
441 code and documentation as a PDF file written in Rmarkdown together with all the raw  
442 datasets needed to reproduce our modeling and analyses (*SI Dataset*).

443 **ACKNOWLEDGMENTS**

444 Financial support of this study was provided by a Deutsche Forschungsgemeinschaft (DFG)  
445 doctoral fellowship awarded to LEP and supervised by OK, JH, and TS (GZ: KR 2089/9-1,  
446 AOBJ: 600454). We thank Sonoran Joint Venture, Tracy Aviary Conservation Fund, and  
447 CONACyT (Convocatoria de Investigación Científica Básica 2010, Grant no. 157570) for  
448 funding fieldwork and L. Lozano-Angulo and M. A. Serrano-Meneses for logistical support.  
449 KM was supported by a NERC GW4+ studentship NE/L002434/1. Molecular sexing was  
450 provided by the NERC molecular genetic facility at Sheffield (NBAF547, NBAF933,  
451 NBAF441). TS was supported by the Hungarian Science Foundation (NKFIH - K 116310)  
452 and was a Fellow at the Advanced Institute of Berlin. Original plover illustrations were  
453 kindly provided by A. Patrick. We are grateful for the helpful guidance and constructive  
454 thoughts kindly offered by S. Beissinger, D. Catlin, M. Galipaud, M. Jennions, P. Korsten, J.  
455 Laake, A. Potiek, A. Shah, and two anonymous reviewers.

456 **REFERENCES**

- 457 1. Bessa-Gomes C, Legendre S, Clobert J (2004) Allee effects, mating systems and the  
458 extinction risk in populations with two sexes. *Ecology Letters* 7 (9):802–812.
- 459 2. Engen S, Lande R, Sæther B-E (2003) Demographic stochasticity and Allee effects in  
460 populations with two sexes. *Ecology* 84 (9):2378–2386.
- 461 3. Hesketh T, Lu L, Xing ZW (2005) The effect of China's one-child family policy after  
462 25 years. *N Engl J Med* 353 (11):1171–1176.
- 463 4. Le Galliard J-F, Fitze PS, Ferrière R, Clobert J (2005) Sex ratio bias, male aggression,  
464 and population collapse in lizards. *Proceedings of the National Academy of Sciences of*  
465 *the United States of America* 102 (50):18231–18236.
- 466 5. Kleindorfer S, Wasser SK (2004) Infant handling and mortality in yellow baboons  
467 (*Papio cynocephalus*). *Behavioral Ecology and Sociobiology* 56 (4):328–337.
- 468 6. McNamara JM, Székely T, Webb JN, Houston AI (2000) A dynamic game-theoretic  
469 model of parental care. *Journal of Theoretical Biology* 205 (4):605–623.
- 470 7. Kokko H, Jennions M (2008) Parental investment, sexual selection and sex ratios.  
471 *Journal of Evolutionary Biology* 21 (4):919–948.
- 472 8. Telschow A, Engelstädter J, Yamamura N, Hammerstein P, Hurst GDD (2006)  
473 Asymmetric gene flow and constraints on adaptation caused by sex ratio distorters.  
474 *Journal of Evolutionary Biology* 19 (3):869–878.
- 475 9. Donald PF (2007) Adult sex ratios in wild bird populations. *Ibis* 149 (4):671–692.
- 476 10. Jennions M, Kokko H (2010) Sexual selection. *Evolutionary Behavioural Ecology*, eds  
477 Westneat DF, Fox CW, pp 343–364.
- 478 11. Székely T, Weissing FJ, Komdeur J (2014) Adult sex ratio variation: implications for  
479 breeding system evolution. *Journal of Evolutionary Biology* 27 (8):1500–1512.
- 480 12. Fromhage L, Jennions MD (2016) Coevolution of parental investment and sexually  
481 selected traits drives sex-role divergence. *Nature Communications* 7:12517.
- 482 13. Liker A, Freckleton RP, Székely T (2013) The evolution of sex roles in birds is related  
483 to adult sex ratio. *Nature Communications* 4:1587.
- 484 14. Remeš V, Freckleton RP, Tökölyi J, Liker A, Székely T (2015) The evolution of  
485 parental cooperation in birds. *Proceedings of the National Academy of Sciences of the*  
486 *United States of America* 112 (44):13603–13608.
- 487 15. Svarer M (2007) Working late do workplace sex ratios affect partnership formation  
488 and dissolution? *J Human Resources* XLII (3):582–595.
- 489 16. Schacht R, Mulder MB (2015) Sex ratio effects on reproductive strategies in humans.  
490 *Open Science* 2 (1):140402.
- 491 17. Wilson EO (1975) *Sociobiology: the new synthesis* (Harvard University Press,

492 Cambridge, MA., USA).

- 493 18. Lovich JE, Gibbons JW (1990) Age at maturity influences adult sex ratio in the turtle  
494 *Malaclemys terrapin*. *Oikos* 59 (1):126.
- 495 19. Komdeur J, Daan S, Tinbergen J, Mateman C (1997) Extreme adaptive modification in  
496 sex ratio of the Seychelles warbler's eggs. *Nature* 385 (6616):522–525.
- 497 20. Bordier C, et al. (2014) Inter-annual variability of fledgling sex ratio in king penguins.  
498 *PLoS ONE* 9 (12):e114052.
- 499 21. Miller TEX, Shaw AK, Inouye BD, Neubert MG (2011) Sex-biased dispersal and the  
500 speed of two-sex invasions. *The American Naturalist* 177 (5):549–561.
- 501 22. Girondot M, Pieau C (1993) Effects of sexual differences of age at maturity and  
502 survival on population sex ratio. *Evolutionary Ecology* 7 (6):645–650.
- 503 23. Heinsohn R, Legge S, Barry S (1997) Extreme bias in sex allocation in Eclectus  
504 parrots. *Proceedings of the Royal Society B: Biological Sciences* 264 (1386):1325–  
505 1329.
- 506 24. Alho JS, Herczeg G, Merilä J (2008) Female-biased sex ratios in subarctic common  
507 frogs. *Journal of Zoology* 275 (1):57–63.
- 508 25. Veran S, Beissinger SR (2009) Demographic origins of skewed operational and adult  
509 sex ratios: perturbation analyses of two-sex models. *Ecology Letters* 12 (2):129–143.
- 510 26. Jenouvrier S, Caswell H, Barbraud C, Weimerskirch H (2010) Mating behavior,  
511 population growth, and the operational sex ratio: a periodic two-sex model approach.  
512 *The American Naturalist* 175 (6):739–752.
- 513 27. Arendt JD, Reznick DN, López Sepulcre A (2014) Replicated origin of female-biased  
514 adult sex ratio in introduced populations of the Trinidadian guppy (*Poecilia*  
515 *reticulata*). *Evolution* 68 (8):2343–2356.
- 516 28. Bolnick DI, et al. (2003) The ecology of individuals: incidence and implications of  
517 individual specialization. *The American Naturalist* 161 (1):1–28.
- 518 29. Lebreton J-D, Burnham KP, Clobert J, Anderson DR (1992) Modeling survival and  
519 testing biological hypotheses using marked animals: a unified approach with case  
520 studies. *Ecological Monographs* 62 (1):67–118.
- 521 30. Lee AM, Sæther B-E, Engen S (2011) Demographic stochasticity, Allee effects, and  
522 extinction: the influence of mating system and sex ratio. *The American Naturalist* 177  
523 (3):301–313.
- 524 31. Küpper C, et al. (2009) Kentish versus snowy plover: phenotypic and genetic analyses  
525 of *Charadrius alexandrinus* reveal divergence of Eurasian and American subspecies.  
526 *The Auk* 126 (4):839–852.
- 527 32. Warriner JS, Warriner JC, Page GW, Stenzel LE (1986) Mating system and  
528 reproductive success of a small population of polygamous snowy plovers. *The Wilson*

- 529 *Bulletin* 98 (1):15–37.
- 530 33. Page GW, Stenzel LE, Warriner JC, Warriner JS, Paton PW (2009) Snowy plover  
531 (*Charadrius alexandrinus*). *The Birds of North America Online* (obpa-nc.org).
- 532 34. Stenzel LE, et al. (2011) Male-skewed adult sex ratio, survival, mating opportunity and  
533 annual productivity in the snowy plover *Charadrius alexandrinus*. *Ibis* 153 (2):312–  
534 322.
- 535 35. Pearson WJ, Colwell MA (2013) Effects of nest success and mate fidelity on breeding  
536 dispersal in a population of snowy plovers *Charadrius nivosus*. *Bird Conservation*  
537 *International* 24 (03):342–353.
- 538 36. Kosztolányi A, Barta Z, Küpper C, Székely T (2011) Persistence of an extreme male-  
539 biased adult sex ratio in a natural population of polyandrous bird. *Journal of*  
540 *Evolutionary Biology* 24 (8):1842–1846.
- 541 37. Pipoly I, et al. (2015) The genetic sex-determination system predicts adult sex ratios in  
542 tetrapods. *Nature* 527:91–94.
- 543 38. Remedios dos N, Székely T, Küpper C, Lee PLM, Kosztolányi A (2015) Ontogenic  
544 differences in sexual size dimorphism across four plover populations. *Ibis* 157  
545 (3):590–600.
- 546 39. Weimerskirch H, Barbraud C, Lys P (2000) Sex differences in parental investment and  
547 chick growth in wandering albatrosses: fitness consequences. *Ecology* 81 (2):309–318.
- 548 40. Fargallo JA, Martínez-Padilla J, Toledano-Díaz A, Santiago-Moreno J, Dávila JA  
549 (2007) Sex and testosterone effects on growth, immunity and melanin coloration of  
550 nestling Eurasian kestrels. *The Journal of Animal Ecology* 76 (1):201–209.
- 551 41. Clutton-Brock TH, Albon SD, Guinness FE (1985) Parental investment and sex  
552 differences in juvenile mortality in birds and mammals. *Nature* 313 (5998):131–133.
- 553 42. Loison A, Langvatn R, Solberg EJ (1999) Body mass and winter mortality in red deer  
554 calves: disentangling sex and climate effects. *Ecography* 22 (1):20–30.
- 555 43. Martín CA, et al. (2007) Sex-biased juvenile survival in a bird with extreme size  
556 dimorphism, the great bustard *Otis tarda*. *Journal of Avian Biology* 38 (3):335–346.
- 557 44. Greenwood PJ, Harvey PH (1982) The natal and breeding dispersal of birds. *Annual*  
558 *Review of Ecology and Systematics* 13:1–21.
- 559 45. Colwell MA, et al. (2007) Philopatry and natal dispersal of the western snowy plover.  
560 *The Wilson Journal of Ornithology* 119 (3):378–385.
- 561 46. Stenzel LE, et al. (2007) Survival and natal dispersal of juvenile snowy plovers  
562 (*Charadrius alexandrinus*) in central coastal California. *The Auk* 124 (3):1023.
- 563 47. Yoder JM, Marschall EA, Swanson DA (2004) The cost of dispersal: predation as a  
564 function of movement and site familiarity in ruffed grouse. *Behavioral Ecology* 15  
565 (3):469–476.



- 566 48. Hardy ICW (2002) *Sex ratios: concepts and research methods* (Cambridge University  
567 Press, Cambridge, UK).
- 568 49. West SA, Reece SE, Sheldon BC (2002) Sex ratios. *Heredity* 88 (2):117–124.
- 569 50. Booksmythe I, Mautz B, Davis J, Nakagawa S, Jennions MD (2015) Facultative  
570 adjustment of the offspring sex ratio and male attractiveness: a systematic review and  
571 meta-analysis. *Biological Reviews*: 92 (1):108–134.
- 572 51. Düsing C (1884) Die Regulierung des Geschlechtsverhältnisses bei der Vermehrung  
573 der Menschen, Tiere und Pflanzen. *Jenaische Zeitschrift für Naturwissenschaft*  
574 17:593–940.
- 575 52. Fisher RA (1930) *The genetical theory of natural selection* (Oxford University Press,  
576 Oxford).
- 577 53. Hamilton WD (1967) Extraordinary sex ratios. A sex-ratio theory for sex linkage and  
578 inbreeding has new implications in cytogenetics and entomology. *Science* 156  
579 (3774):477–488.
- 580 54. Trivers RL (1985) *Social evolution* (The Benjamin/Cummings Publishing Company,  
581 Menlo Park, California).
- 582 55. West S (2009) *Sex allocation* (Princeton University Press, Princeton, New Jersey).
- 583 56. Székely T, Liker A, Freckleton RP, Fichtel C, Kappeler PM (2014) Sex-biased  
584 survival predicts adult sex ratio variation in wild birds. *Proceedings of the Royal*  
585 *Society B: Biological Sciences* 281 (1788):20140342–20140342.
- 586 57. Küpper C, et al. (2010) Heterozygosity-fitness correlations of conserved microsatellite  
587 markers in Kentish plovers *Charadrius alexandrinus*. *Molecular Ecology* 19  
588 (23):5172–5185.
- 589 58. Argüelles-Tico A, et al. (2015) Geographic variation in breeding system and  
590 environment predicts melanin-based plumage ornamentation of male and female  
591 Kentish plovers. *Behavioral Ecology and Sociobiology* 70 (1):49–60.
- 592 59. Heppell SS, Caswell H, Crowder LB (2000) Life histories and elasticity patterns:  
593 perturbation analysis for species with minimal demographic data. *Ecology* 81 (3):654.
- 594 60. Morris WF, Doak DF (2002) *Quantitative conservation biology: theory and practice*  
595 *of population viability analysis* (Sinauer Associates, Inc., Sunderland, Massachusetts,  
596 USA).
- 597 61. Nichols J, Williams B (2006) Monitoring for conservation. *Trends in Ecology &*  
598 *Evolution* 21 (12):668–673.
- 599 62. Liker A, Székely T (2005) Mortality costs of sexual selection and parental care in  
600 natural populations of birds. *Evolution* 59 (4):890–897.
- 601 63. Székely T, Argüelles-Tico A, Kosztolányi A, Küpper C (2011) Practical guide for  
602 investigating breeding ecology of Kentish plover. 1–16.

- 603 64. Dawson DA, et al. (2007) Gene order and recombination rate in homologous  
604 chromosome regions of the chicken and a passerine bird. *Molecular Biology and*  
605 *Evolution* 24 (7):1537–1552.
- 606 65. Küpper C, et al. (2007) Characterization of 36 polymorphic microsatellite loci in the  
607 Kentish plover (*Charadrius alexandrinus*) including two sex-linked loci and their  
608 amplification in four other *Charadrius* species. *Molecular Ecology Notes* 7 (1):35–39.
- 609 66. Piersma T, Wiersma P (1996) Family Charadriidae (Plovers). *Handbook of the Birds*  
610 *of the World*, eds del Hoyo J, Elliott A, Sargatal J (Barcelona, Spain), pp 384–443.
- 611 67. Caswell H (2001) *Matrix population models: construction, analysis, and interpretation*  
612 (Sinauer Associates, Inc., Sunderland, Massachusetts, USA). 2nd Ed.
- 613 68. Miller TEX, Inouye BD (2011) Confronting two-sex demographic models with data.  
614 *Ecology* 92 (11):2141–2151.
- 615 69. Caswell H (2008) Perturbation analysis of nonlinear matrix population models.  
616 *Demographic Research* 18:59–116.
- 617 70. Caswell H, Weeks DE (1986) Two-sex models: chaos, extinction, and other dynamic  
618 consequences of sex. *The American Naturalist* 128 (5):707–735.
- 619 71. Haridas CV, Eager EA, Rebarber R, Tenhumberg B (2014) Frequency-dependent  
620 population dynamics: effect of sex ratio and mating system on the elasticity of  
621 population growth rate. *Theoretical Population Biology* 97:49–56.
- 622 72. R Core Team (2016) R: A language and environment for statistical computing.  
623 doi:ISBN 3-900051-07-0.
- 624 73. Colwell MA, Hurley SJ, Hall JN, Dinsmore SJ (2007) Age-related survival and  
625 behavior of snowy plover chicks. *The Condor* 109 (3):638–647.
- 626 74. Catlin DH, Felio JH, Fraser JD (2011) Effect of great-horned owl trapping on chick  
627 survival in piping plovers. *The Journal of Wildlife Management* 75 (2):458–462.
- 628 75. Laake J, Rexstad E (2008) RMark – an alternative approach to building linear models  
629 in MARK. *Program MARK a gentle introduction*, eds Cooch EG, White GC.
- 630 76. White GC, Burnham KP (1999) Program MARK: survival estimation from  
631 populations of marked animals. *Bird Study* 46 (sup1):S120–S139.
- 632 77. Bates D, Mächler M, Bolker B, Walker S (2015) Fitting linear mixed-effects models  
633 using lme4. *Journal of Statistical Software* 67:1–48.

634 **Figure legends**

635 *Figure 1.* Sex bias in mating system illustrated as the per capita annual number of mates  
636 acquired by male and female snowy plovers (Mann-Whitney-Wilcoxon test:  $W = 3264$ ,  $P <$   
637  $0.001$ ,  $N = 456$  families).

638 *Figure 2.* (a) Bootstrap distributions of stage-specific sex biases in apparent survival  
639 estimates, with internal lines indicating median and interquartile ranges, and shades of grey  
640 corresponding to first-year (light grey) or adult (dark grey) parameters shown in Fig. 6; (b)  
641 Bootstrap distribution of the derived ASR, with the horizontal bar above the distribution  
642 indicating the 95% confidence interval of the ASR estimate based on 1000 iterations (mean  
643 ASR = 0.632 [95% CI: 0.460 – 0.785]); (c) relative contributions of model components to  
644 ASR in our life table response experiment (LTRE) which compared the empirically-derived  
645 sex-specific model to a theoretical model in which survivorships did not differ between the  
646 sexes. Our measure of ASR was expressed as the proportion of the adult population that is  
647 male, thus changes in female-biased parameters have a negative effect on ASR and thus their  
648 LTRE statistics are negative.

649 *Figure 3.* Sex-specific sensitivity analysis of population growth ( $\lambda$ ) under four scenarios of  
650 ASR and mating system. Notation:  $h$  = mating system index,  $\rho$  = hatching sex ratio,  $\phi$  =  
651 apparent survival.

652 *Figure 4.* Distributions of deterministic population growth ( $\lambda$ ) under a two-sex frequency-  
653 dependent matrix model (black) and a conventional one-sex matrix model (red) compared to  
654 the observed average annual population growth ( $\bar{\lambda}$ ) over the seven-year study period (blue  
655 vertical line). Horizontal bars above each distribution represent the 95% confidence intervals  
656 of the bootstrap simulation for each model.

657 *Figure 5.* Schematic representation of the sex- and stage-specific demographic feedbacks  
658 between ASR, mating system, and population viability. In our study system, ASR bias is  
659 driven by sex-specific survival of early life-history stages (i), and likely facilitates a  
660 polygamous mating system (ii). Both, ASR bias and polygamy, contribute to sex-specific  
661 elasticities of population growth (iii), with ASR having the strongest effect as illustrated by  
662 arrow width.

663 *Figure 6.* Snowy plover life cycle flow diagram illustrating sex-specific survival ( $\phi$ ) among  
664 three life stages (chick =  $C$ , juvenile =  $J$ , and adult =  $A$ ) and the link between the sexes via the  
665 frequency-dependent mating function ( $R$ , see methods). The hatching sex ratio ( $\rho$ , proportion  
666 of male hatchlings) serves as a proxy for the primary sex ratio and allocates progeny to the  
667 male or female chick stage. Lower-level parameters (i.e. chick and juvenile survival)  
668 constitute the transition of first-year individuals illustrated in light grey.

669 **Tables**

670 *Table 1.* Summary statistics of sex- and stage-specific estimates of the snowy plover

671 population. Notation includes:  $N$  = number of individual encounter histories used for mark-

672 recapture modelling,  $\phi$  = apparent survival, and  $p$  = encounter probability. Estimates are

673 shown as the median and 95% confidence interval of each bootstrapped distribution.

| Sex    | Stage    | $N$ | $\phi$              | $p$                 |
|--------|----------|-----|---------------------|---------------------|
| Female | Chick    | 416 | 0.48<br>(0.41–0.55) | 0.56<br>(0.53–0.58) |
|        | Juvenile | 234 | 0.15<br>(0.11–0.19) | 0.48<br>(0.34–0.62) |
|        | Adult    | 221 | 0.68<br>(0.62–0.74) | 0.52<br>(0.40–0.65) |
| Male   | Chick    | 372 | 0.53<br>(0.47–0.60) | 0.55<br>(0.53–0.58) |
|        | Juvenile | 243 | 0.22<br>(0.18–0.27) | 0.66<br>(0.48–0.74) |
|        | Adult    | 212 | 0.69<br>(0.63–0.74) | 0.66<br>(0.54–0.77) |

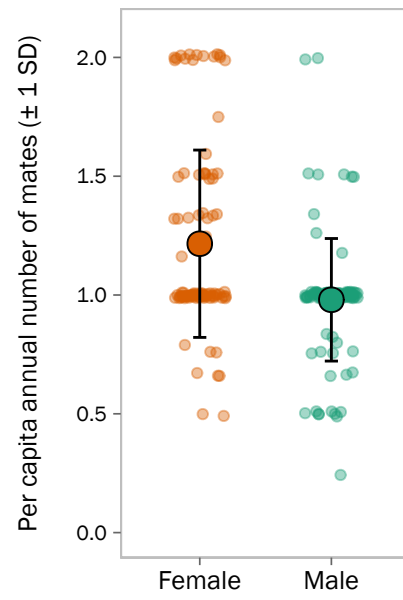

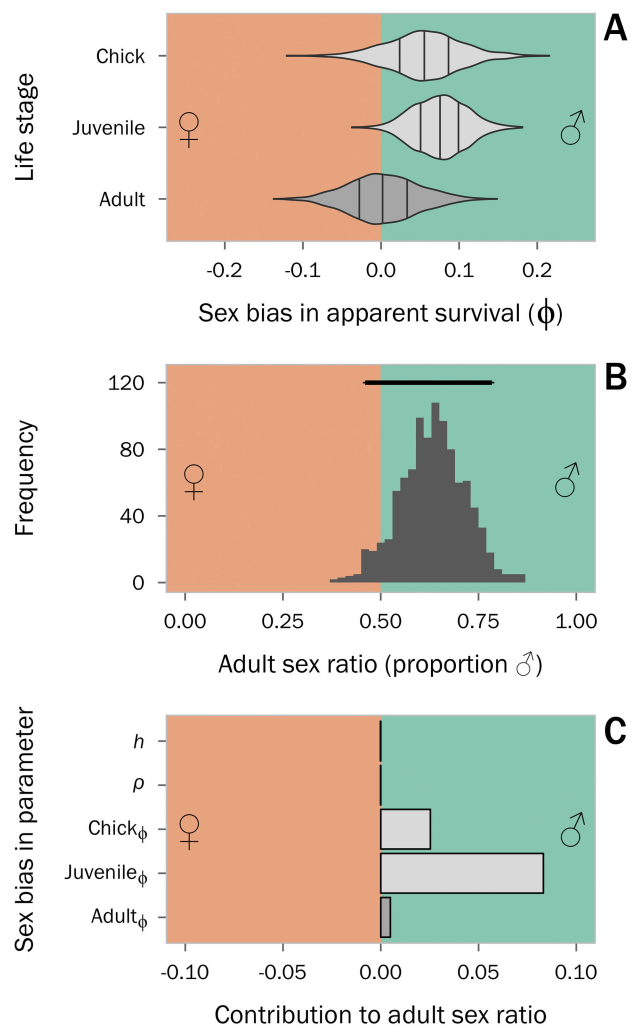

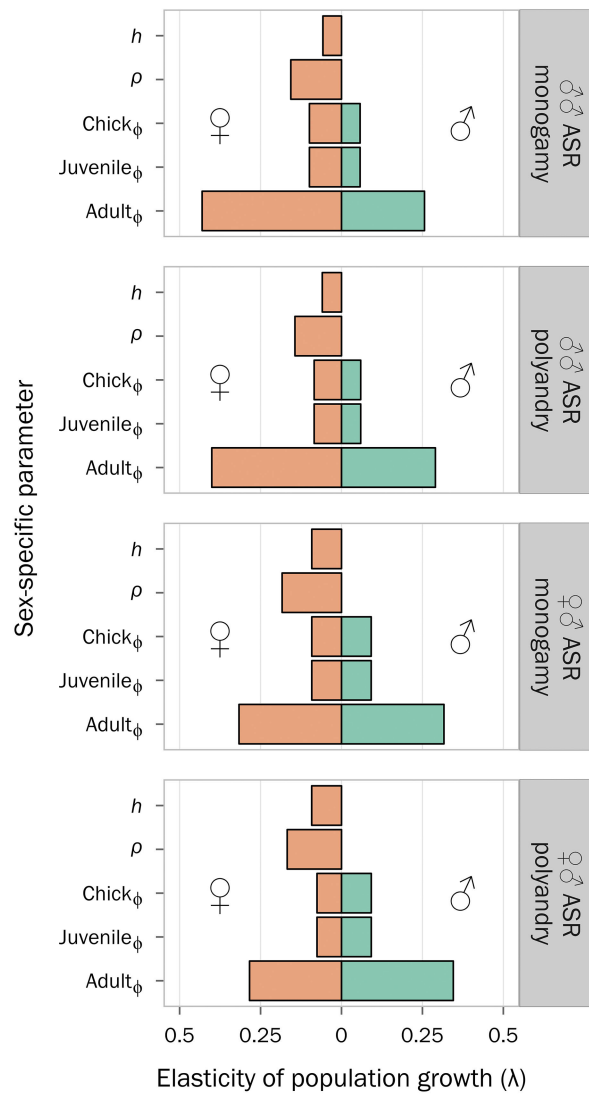



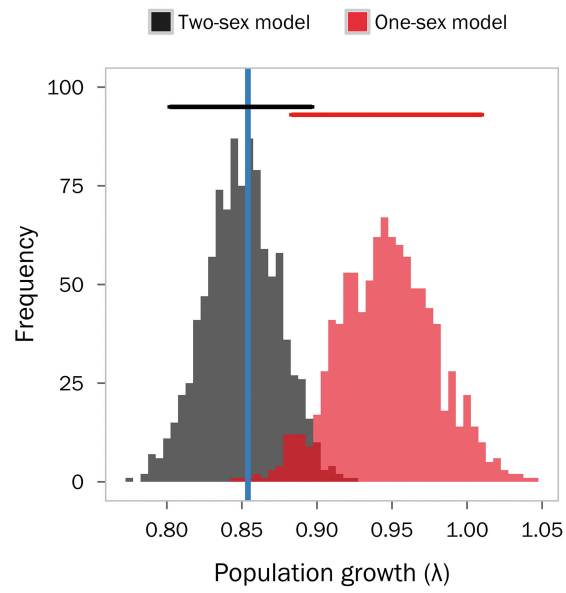

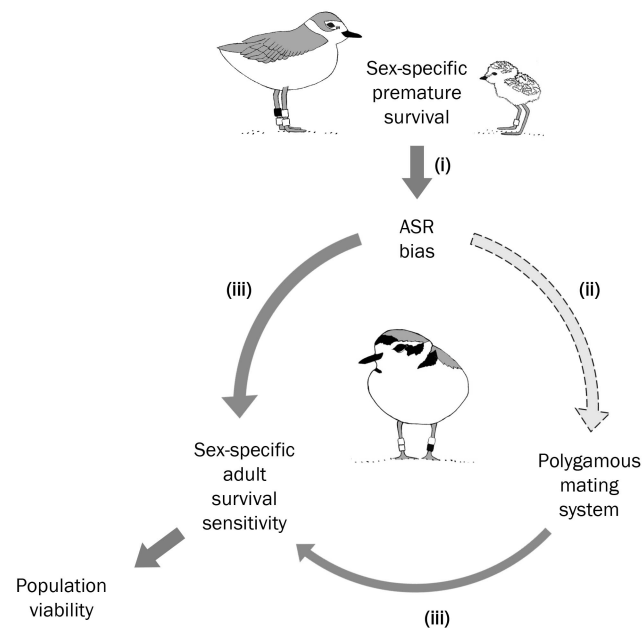

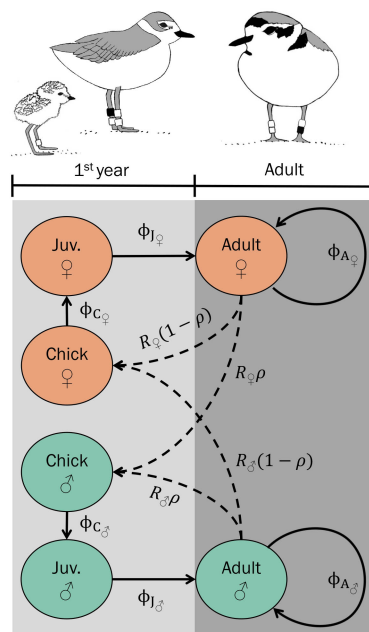

Source: http://biorxiv.org/content/10.1101/117580v1.full.pdf
